# Supplementary material for: Assessing Medication Management Practices at University Hospital of Ibn Sina: A Cross-Sectional Study
Source: Research Square preprint supplement (doi:10.21203/rs.3.rs-6623455/v1), 2025-06-16
Supplement: Supplementary file 1 [file faad25b0836a93a0968ea414.docx]

## Supplementary File: Survey Questionnaire

## Assessing Medication Management Practices at University Hospital of Ibn Sina: A Cross-Sectional Study

# Dear Healthcare Professional,

# As part of my doctoral thesis in Pharmacy, I am conducting a study titled: “Assessing Medication Management Practices at University Hospital of Ibn Sina: A Cross-Sectional Study”. The objective of this research is to develop an optimized model for medication management circuits that prioritizes safety and quality care for patients.

# The medication Management is defined as the process of pharmaceutical therapeutic management of a patient within a healthcare facility. This interdisciplinary process includes the steps of prescribing, dispensing, administering, and therapeutic monitoring, and also involves the processing of information.

# The hospital medication Management consists of a series of successive steps carried out by different professionals. Moreover, this is integrated with the logistics, clinical, and information systems.

# Your participation will contribute significantly to improving the medication Management (logistics, clinical, and digital) at CHU Ibn Sina and ensuring quality care for all patients. Please find attached the survey. We kindly ask you to complete and return it by December 11, 2024. If you have any questions regarding this study, do not hesitate to contact me using the information provided below.

# Your responses will be treated confidentially. We sincerely thank you for your time and contribution to this important research.

## Email: mamat_jasseh@um5.ac.ma

## Section A: General Information

This section aims to collect basic information about you and your professional role at CHU Ibn Sina.

**1. What is your professional profile?**
 ☐ Medical Doctor
 ☐ Pharmacist
 ☐ Nurse
 ☐ Pharmacy Assistant
 ☐ Nursing Assistant
 ☐ Other (please specify): ___________

**2. How long have you held this position?**
 ☐ Less than 1 year
 ☐ 1–3 years
 ☐ 4–6 years
 ☐ 7–10 years
 ☐ More than 10 years

**3. What is your gender?**
 ☐ Male
 ☐ Female

4. In which Facility / Hospital of Affiliation do you work? *

☐ National Oncology Institute

☐ Pediatric Hospital

☐ Specialty Hospital

☐ Souissi Maternity Hospital

☐ Ibn Sina Hospital

☐ Ar-Razi Psychiatric Hospital

☐ Moulay Youssef Hospital

☐ Al Ayachi Hospital

☐ Les Orangers Maternity and Reproductive Center

☐ Dental Consultation & Treatment Center

☐ CHU Ibn Sina Directorate

☐ Other (please specify): ___________

**5. In which department do you work?**
 ☐ Emergency
 ☐ Clinical services
 ☐ Pharmacy services
 ☐ outpatient hospital
 ☐ Other (please specify): ___________

## Section B: Awareness and Satisfaction with Medication Management

This section explores your awareness and opinion of the medication management in your department.

**6. Are you aware of the existence of a medication policy at CHU Ibn Sina?**

☐ Yes

☐ No

☐ Maybe

☐ I don’t know

**7. How would you evaluate the medication circuit in your department?**

☐ Very satisfactory

☐ Satisfactory

☐ Dissatisfactory

☐ low satisfactory

## Section C: Prescription Practices and Support Tools

This section evaluates the tools and resources supporting medication prescribing.

**8. What tools or resources are available to support evidence-based prescribing in your department?**

☐ Manual Clinical guidelines

☐ Clinical protocols

☐ Drug formularies

☐ Electronic decision-support system

☐ Training programs

☐ All of the above

☐ None of the above

☐ Other (please specify): ___________

**9. Do you use electronic prescribing software in your department?**

☐ Yes

☐ No

☐ Sometimes

**10. If yes, can you name it?**

Your answer: ___________

## Section D: Dispensing Practices by Pharmacists

This section examines verification and compliance in the dispensing process.

**11. Are prescriptions systematically verified by the pharmacist before dispensing?**

☐ Yes

☐ No

☐ Sometimes

☐ I don’t know

**12. Are prescriptions always compliant before medication is dispensed?**

☐ Yes

☐ No

☐ Sometimes

**13. Is there a traceability system for dispensed medications?**

☐ Yes

☐ No

**14. If yes, please specify:**

Your answer: ___________

**15. Does your department use automated cabinets for dispensing medications?**

☐ Yes

☐ No

**16. If yes, please mention the advantages and disadvantages of these cabinets:**

Your answer: ___________

## Section E: Medication Administration

This section evaluates compliance and tools used during medication administration.

**17. Is the medical prescription always checked by the nurse before administration?** ☐ Always
 ☐ Often
 ☐ Sometimes
 ☐ Rarely
 ☐ Never

**18. Do you use tools or technologies to reduce administration errors (e.g., barcodes, electronic alerts, patient ID bracelets, barcode scanners)?** ☐ Yes
 ☐ No

**19. Are there safety measures in place for monitoring patients after medication administration ( e.g, side effects reporting, clinical monitoring)?** ☐ Yes
 ☐ No

## Final Comments (Optional)

**20. Do you have any suggestions to improve medication management practices at CHU Ibn Sina?** ____________________________________________________________________

**Confidentiality Note**: This survey is anonymous. No personal identifying information will be collected. Your participation is voluntary, and you may withdraw at any time.
